# Supplementary material for: Production of a Novel Tetrahydroxynaphthalene (THN) Derivative from Nocardia sp. CS682 by Metabolic Engineering and Its Bioactivities
Source: PubMed Central journal article supplement (PMC6358914; doi:10.3390/molecules24020244), 2019-01-10
Supplement: molecules-24-00244-s001.pdf [file molecules-24-00244-s001.pdf]

## Supplemental Materials for

*Communication*

# Production of a Novel Tetrahydroxynaphthalene (THN) Derivative from *Nocardia* sp. CS682 by Metabolic Engineering and its Bioactivities

Ravindra Mishra <sup>1,#</sup>, Dipesh Dhakal <sup>1,#</sup>, Jang Mi Han <sup>1</sup>, Haet Nim Lim <sup>1</sup>, Hye Jin Jung <sup>1,2</sup>, Tokutaro Yamaguchi <sup>1,2</sup> and Jae Kyung Sohng <sup>1,2,\*</sup>

<sup>1</sup> Institute of Biomolecule Reconstruction (iBR), Department of Life Science and Biochemical Engineering, Sun Moon University, 70 Sun Moon-ro 221, Tangjeong-myeon, Asan-si, Chungnam 31460, Korea; ravindra.mishra44@gmail.com (R.M.); medipesh@gmail.com (D.D.); gkswkdal200@naver.com (J.M.H.); gotala9210@naver.com (H.N.L.); poka96@sunmoon.ac.kr (H.J.J.); yamaguchi@sunmoon.ac.kr (T.Y.)

<sup>2</sup> Department of BT-Convergent Pharmaceutical Engineering, Sun Moon University, 70 Sun Moon-ro 221, Tangjeong-myeon, Asan-si, Chungnam 31460, Korea.

\* Correspondence: sohng@sunmoon.ac.kr; Tel.: 82-41-530-2246

# These authors contributed equally.

## Figure Captions

**Figure S1.** Confirmation of deletion by PCR of (A) PCR probe for confirmation of deletion of PKS using probe 1 (~1.2kb) D1: *Nocardia* sp. CS682DR, W1: *Nocardia* sp. CS682 and probe 2 (~0.9kb) D2: *Nocardia* sp. CS682DR, W2: *Nocardia* sp. CS682, M: ladder; (B)PCR probe for amplification of marker gene *tsr<sup>r</sup>* (1034 bp), M: DNA ladder, W: *Nocardia* sp. CS682, D: *Nocardia* sp. CS682DR (C) PCR probe for amplification of *apr<sup>r</sup>* (777bp) V: pULVK2A used as positive control, M: DNA ladder, W: *Nocardia* sp. CS682, D: *Nocardia* sp. CS682DR

**Figure S2.** <sup>1</sup>H of NMR of compound IBR-3

**Figure S3.** <sup>13</sup>C NMR of compound IBR-3

**Figure S4.** COSY of compound IBR-3

**Figure S5.** ROESY of compound IBR-3

**Figure S6.** HSQC-DEPT of compound IBR-3

**Figure S7.** HMBC of compound IBR-3

**Figure S8.** HR-QTOF mass analysis of nargenicin A1

**Figure S9.** HR-QTOF mass analysis of compound IBR-1

**Figure S10.** HR-QTOF mass analysis of compound IBR-2

**Figure S11.** HR-QTOF mass analysis of compound IBR-3

**Figure S12.** HR-QTOF mass analysis of compound IBR-4

**Figure S13.** The anticancer activities of compound IBR-3 against various cancer cell lines

**Figure S14.** Melanin formation assay of compound IBR-3 using B16F10 melanoma cell

## **Table Legends**

**Table S1.** List of strains and vectors used in the study

**Table S2.** Oligonucleotides used in the study

Fig. S1

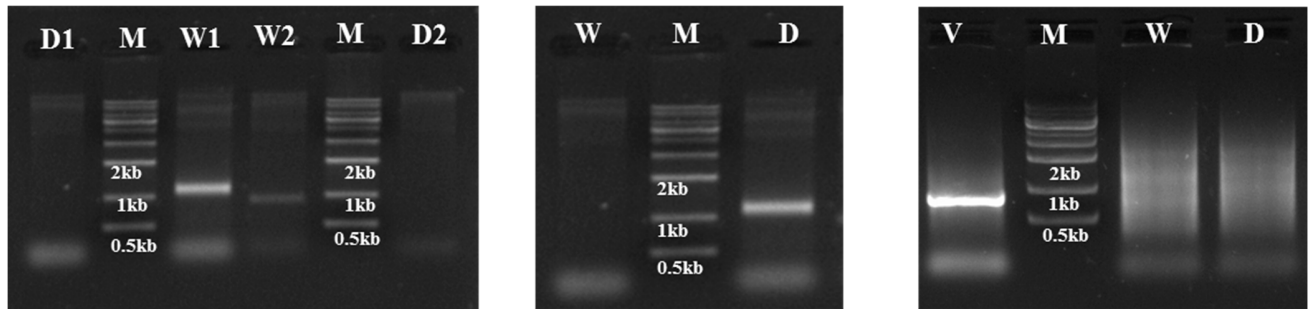

Fig. S2

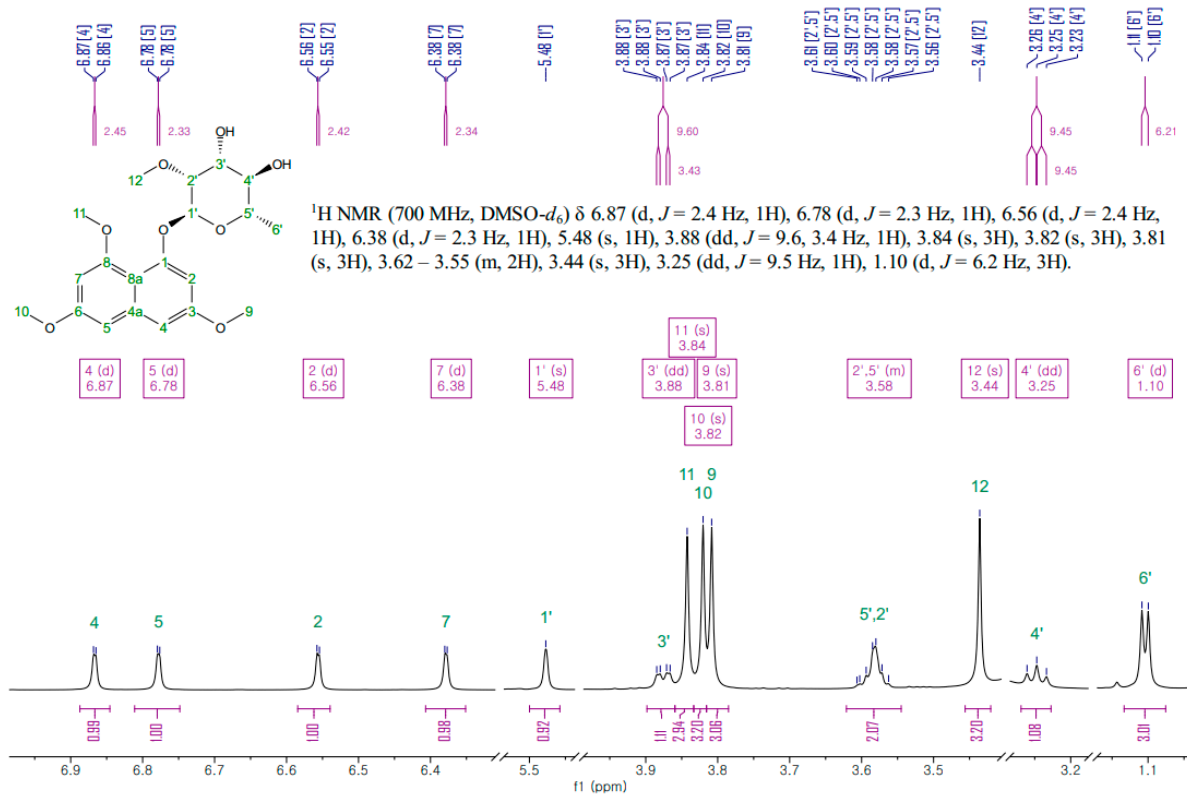

Fig. S3

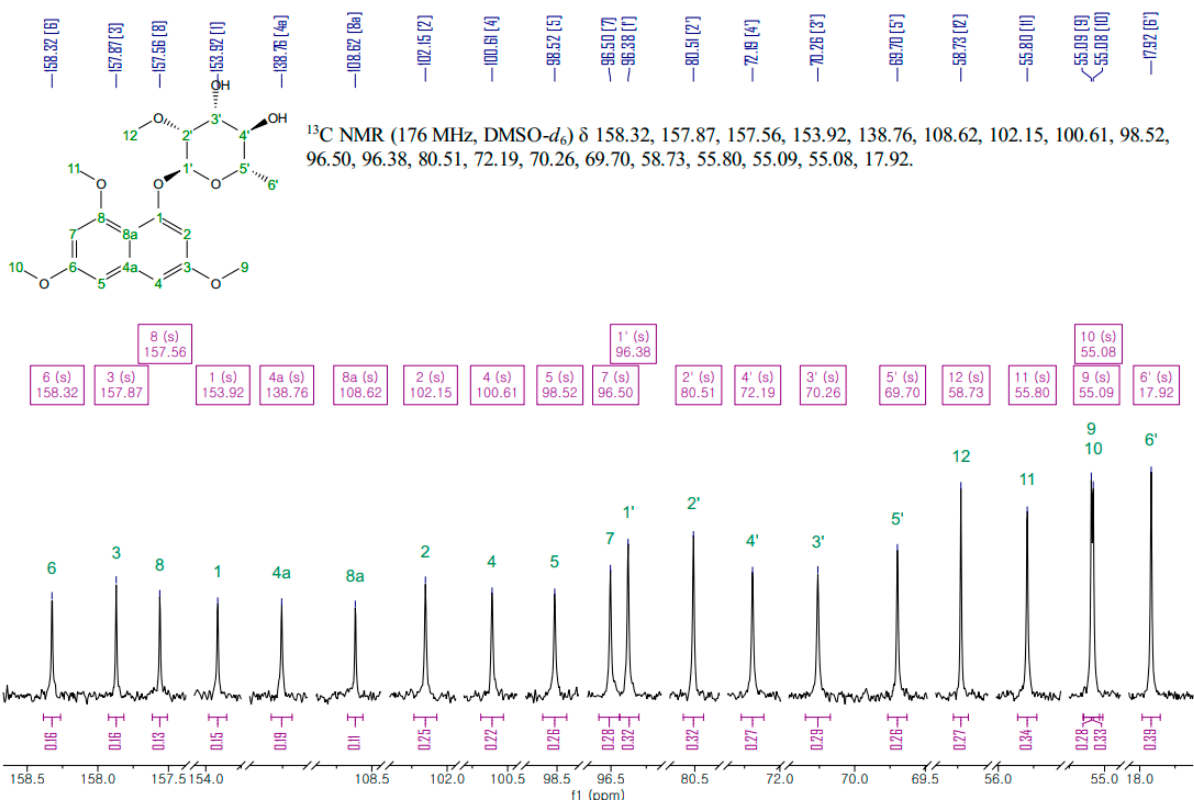

Fig. S4

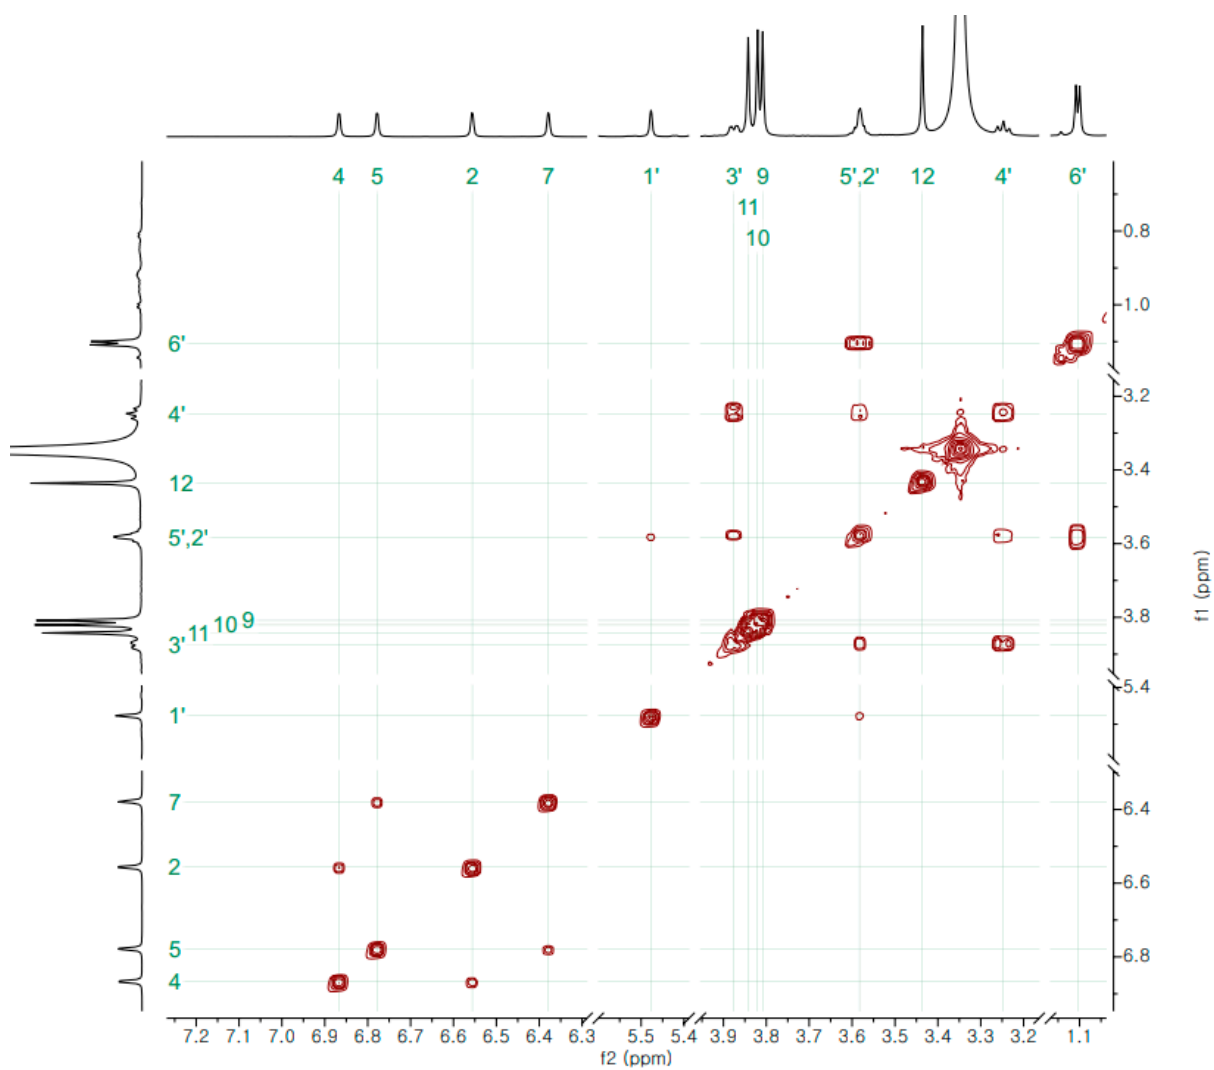

Fig. S5

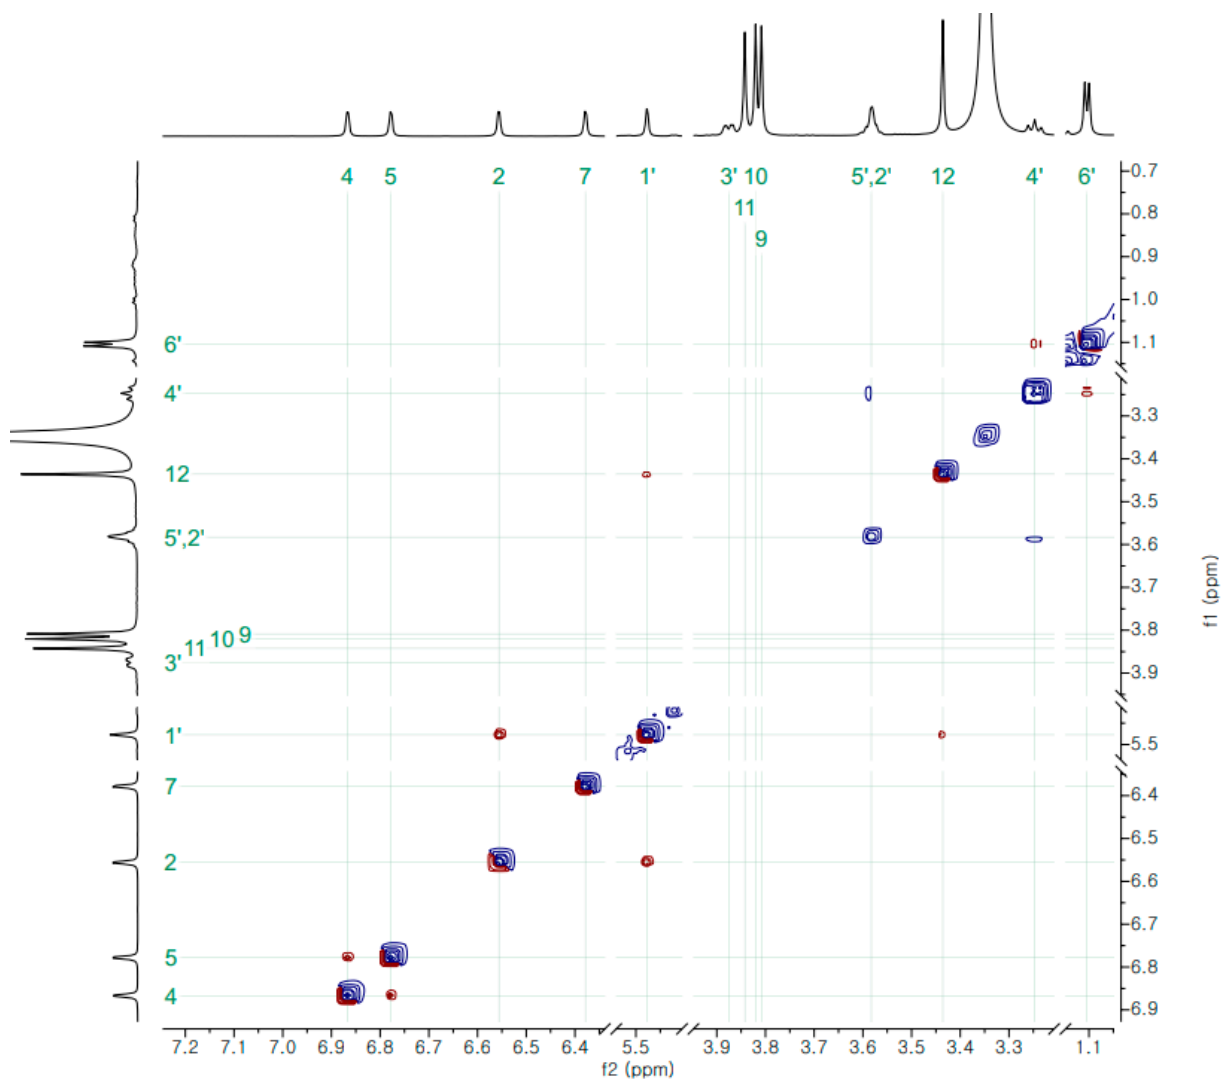



Fig. S6

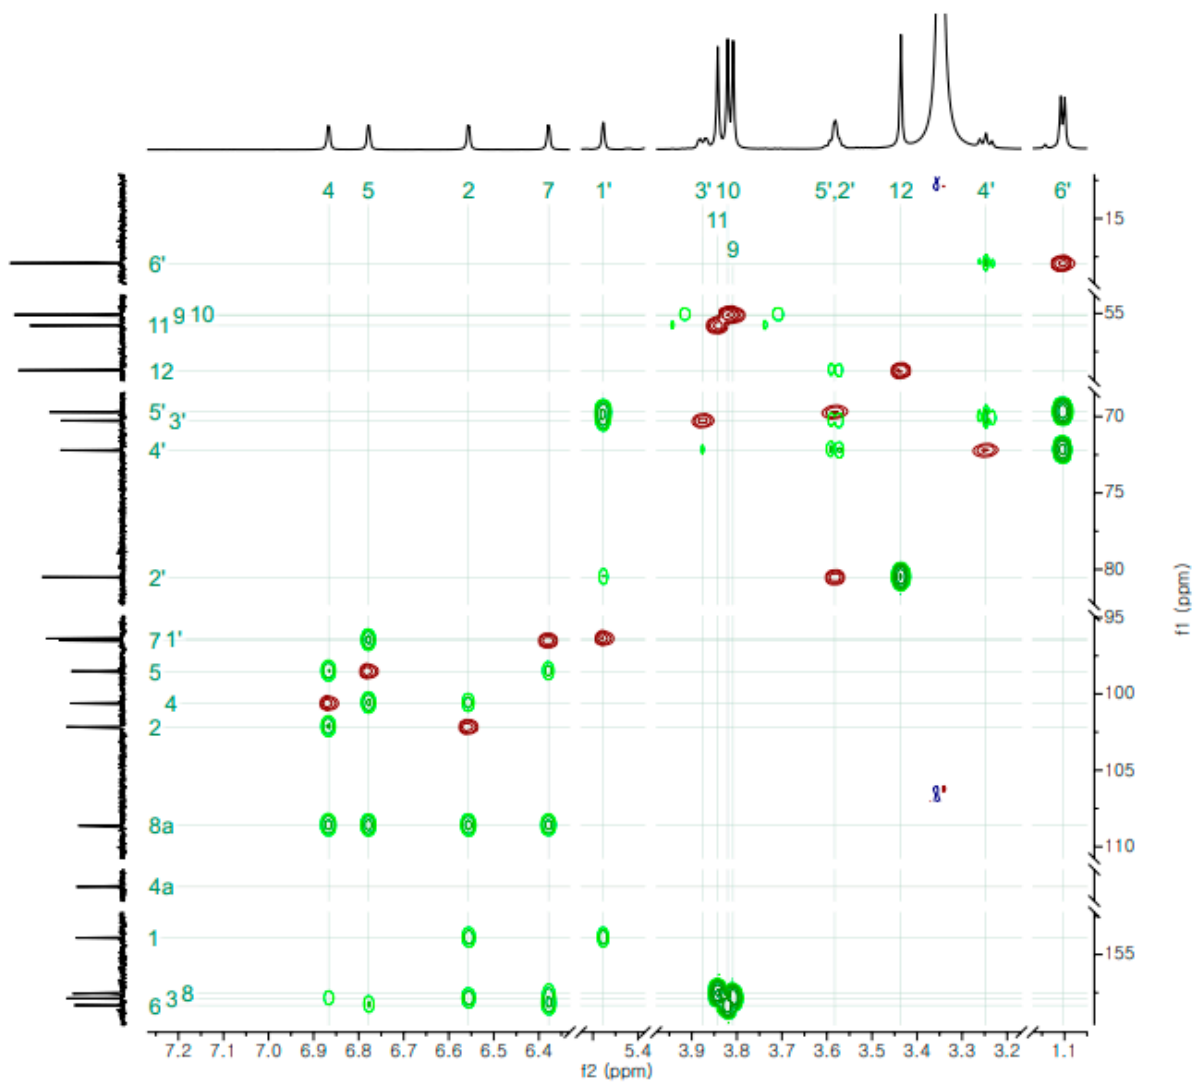

Figure S7

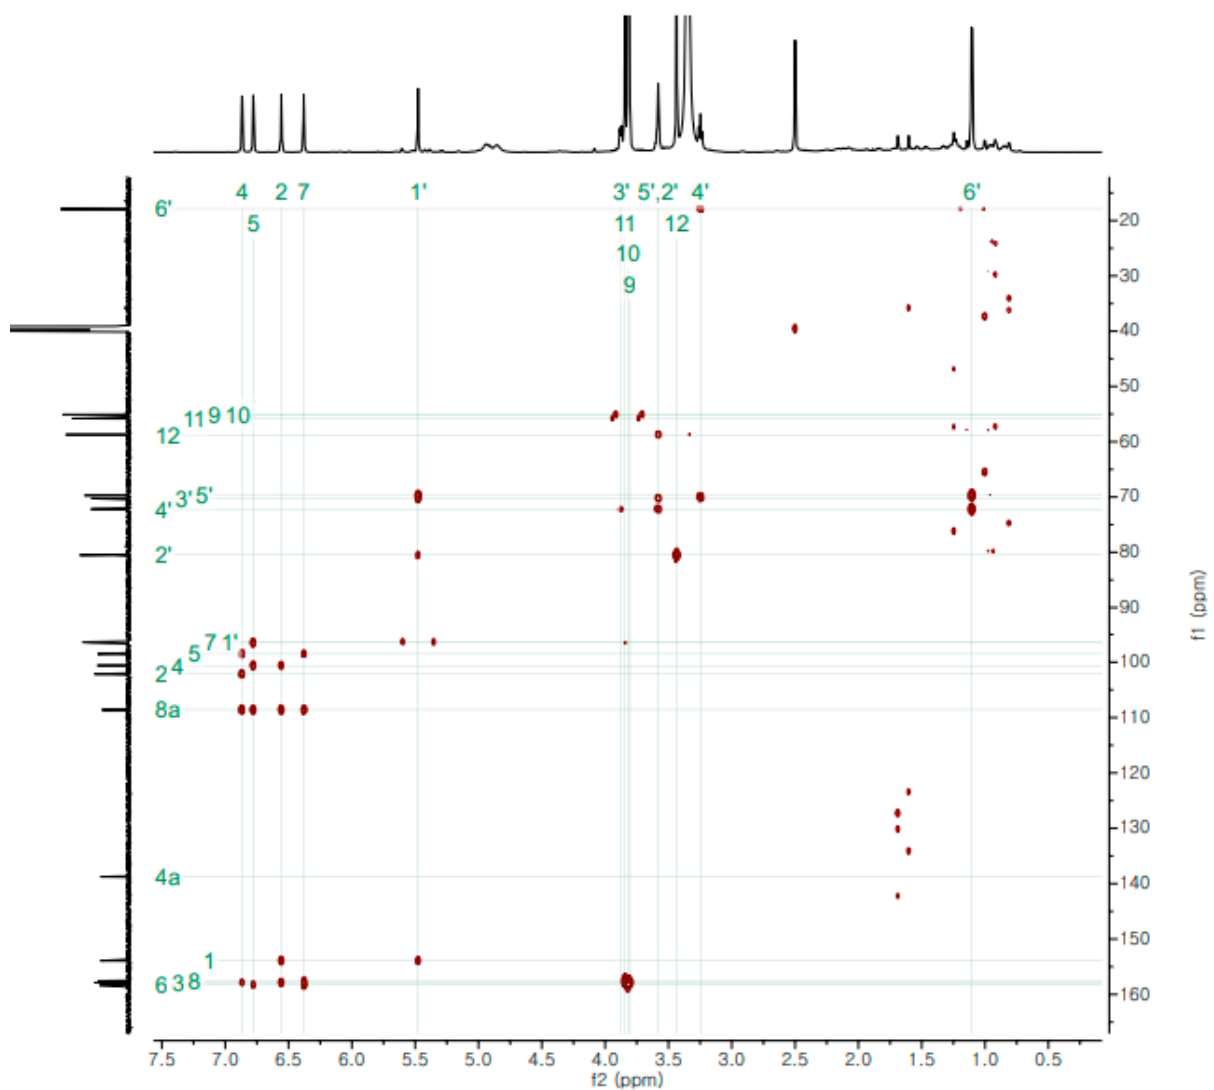

Fig. S8

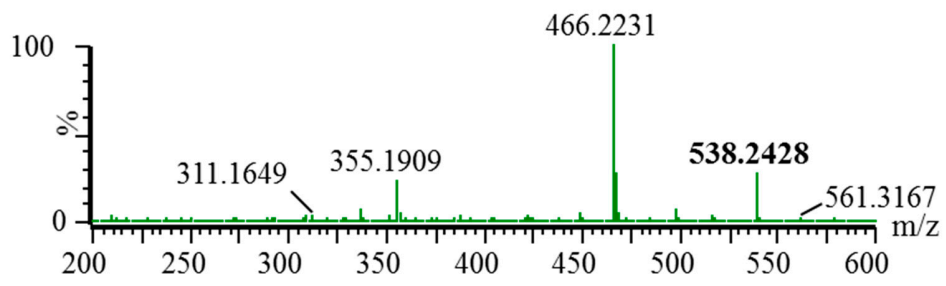

Fig. S9

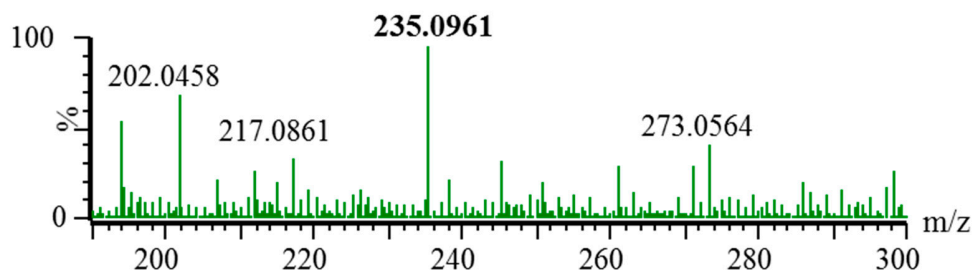

Fig. S10

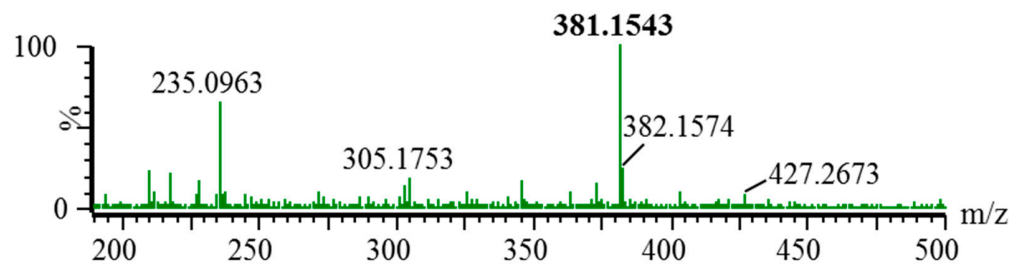

Fig. S11

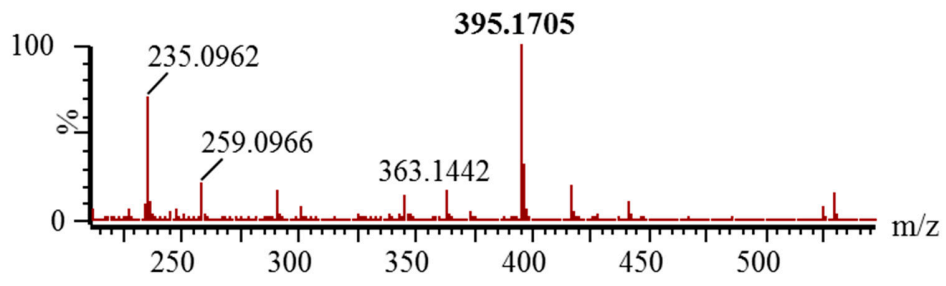

Fig. S12

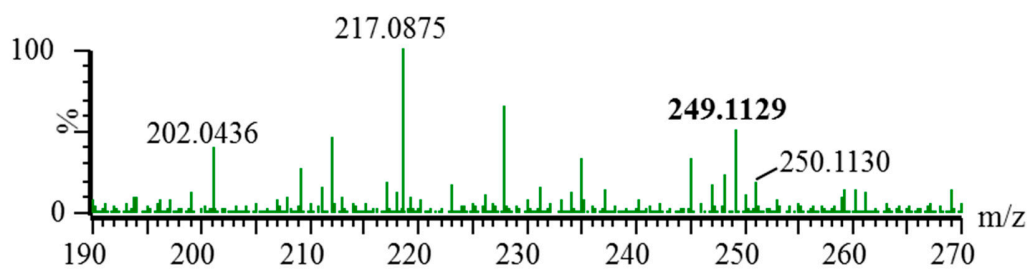

**Figure S13.**

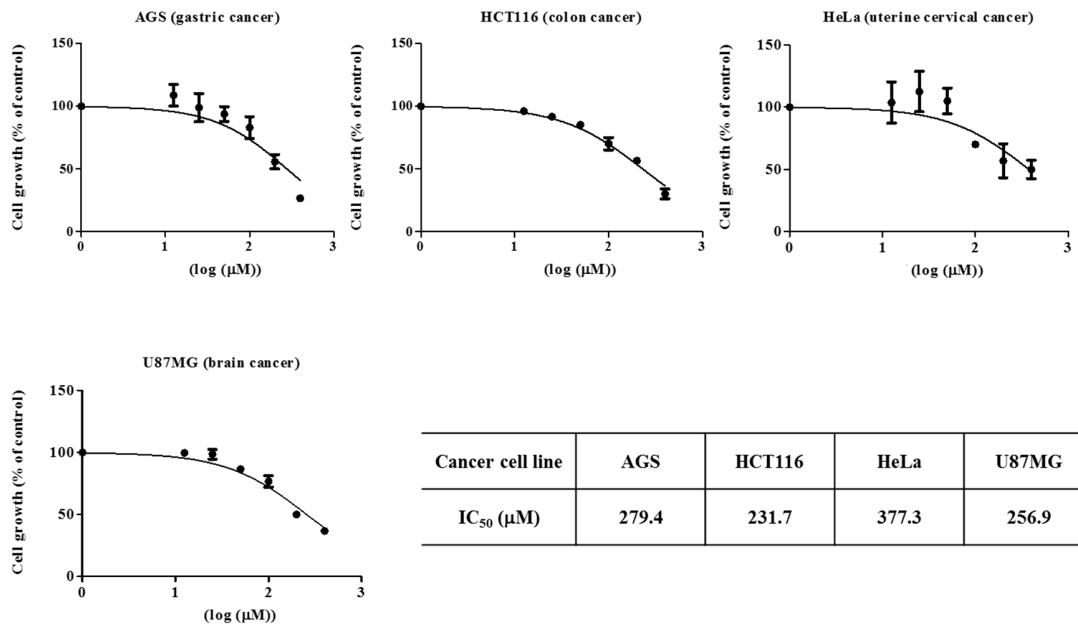

| Cancer cell line      | AGS   | HCT116 | HeLa  | U87MG |
|-----------------------|-------|--------|-------|-------|
| IC <sub>50</sub> (μM) | 279.4 | 231.7  | 377.3 | 256.9 |



Figure S14.

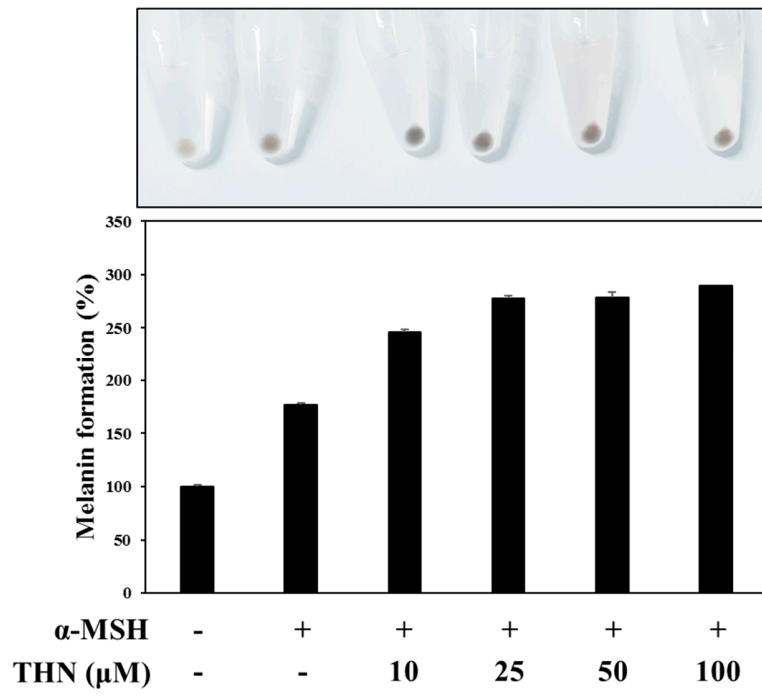

**Table S1.** List of strains and vectors used in the study

| Bacterial strains, plasmids and rDNAs | Relevant characteristics                                                                        | Sources               |
|---------------------------------------|-------------------------------------------------------------------------------------------------|-----------------------|
| <b>Bacterial strains</b>              |                                                                                                 |                       |
| <i>E. coli</i> XL1Blue MRF            | $\Delta(mcrA)183 \Delta(mcrCB-hsdSMR-mrr)173 \text{ endA1 supE44 thi-1 recA1 gyrA96 relA1 lac}$ | Stratagene, USA       |
| <i>E. coli</i> ET-12567               | DNA demethylating strain ( $\text{dam}^- \text{dcm}^- \text{hsdS cm}^R$ )                       | John Innes Center, UK |
| <i>Nocardia</i> sp. CS682             | Wild type producer of nargenicin A1                                                             | Sohng et al. 2008     |
| <i>Nocardia</i> sp. CS682DR           | Mutant strain with inactivation of nargenicin biosynthesis                                      | This study            |
| <b>Plasmids and rDNAs</b>             |                                                                                                 |                       |
| pGEM <sup>®</sup> -T Easy             | T <sub>7</sub> and SP6 promoters, <i>ColE1 ori</i> , <i>lacZ</i> , <i>Amp<sup>R</sup></i>       | Promega, USA          |
| pKC1139                               | Multi copy <i>E. coli-Streptomyces</i> shuttle vector                                           |                       |
| pULVK2A                               | <i>Nocardia-E. coli</i> shuttle vector, <i>neo<sup>r</sup></i> , <i>apr<sup>r</sup></i>         | Kelly and Townsend    |
| pDN                                   | pULVK2A containing deletion cassette for nargenicin A1 PKS region                               | This study.           |

**Table 2.** Oligonucleotides used in the study

| Gene             | Sequence (5'-3')                             | Restriction site | Notes                                                                                                                |
|------------------|----------------------------------------------|------------------|----------------------------------------------------------------------------------------------------------------------|
| <i>delPKup-F</i> | GGATTTCGCTCGCTGGACCGGGTC                     | <i>Bam</i> HI    | For amplification of upstream region for deletion of PKS                                                             |
| <i>delPKup-R</i> | GGTACCGTCGGACGGTTCGTGCAA                     | <i>Kpn</i> I     |                                                                                                                      |
| <i>delPKdn-F</i> | GGTACCGCTGGCCCGTGGACCACAGCG                  | <i>Kpn</i> I     | For amplification of downstream region for deletion of PKS                                                           |
| <i>delPKdn-R</i> | AAGCTTGTGCTGGTACTCCTGTGATCTCTCGGT            | <i>Hind</i> III  |                                                                                                                      |
| <i>tsrF</i>      | GGTACCTGCAGTAACTCTAGATTTAAATGTATGATCAAGGCCAA | <i>Kpn</i> I     | For confirmation of double cross over mutant by PCR of thiostrepton resistance gene used as selection marker         |
| <i>tsrR</i>      | GGTACCTGCAGTAACTCTAGATTTAAACAGAGGCGCTTATCGGT | <i>Kpn</i> I     |                                                                                                                      |
| <i>aprF</i>      | ATGCAATACGAATGGCGA                           |                  | For confirmation of loss of vector in double cross over mutant by PCR of apramycin resistance gene                   |
| <i>aprR</i>      | TCAGCCAATCGACTGGCG                           |                  |                                                                                                                      |
| <i>p1-F</i>      | CCCCGTACACCTTCACCGGGTCCC                     |                  | For confirmation of deletion by PCR amplification of internal segment of PKS of nargenicin biosynthetic gene cluster |
| <i>p1-R</i>      | GCCATGCCGACCCACTGCGAGCCCT                    |                  |                                                                                                                      |
| <i>p2-F</i>      | CGCCTCGCGTGCCTCGAGGACCGGA                    |                  |                                                                                                                      |
| <i>p2-R</i>      | GTCTTCTCACGGTCTCCTGAGCTGA                    |                  |                                                                                                                      |
| <i>orf1-F</i>    | CGAGCAAGCTATCCATCGTG                         |                  | For qRT-PCR of <i>orf1</i>                                                                                           |
| <i>orf1-R</i>    | ACAACGCCAGCATTATGACC                         |                  |                                                                                                                      |
| <i>orf2-F</i>    | GGTACGTTCACCCGTGATG                          |                  | For qRT-PCR of <i>orf2</i>                                                                                           |
| <i>orf2-R</i>    | CCTGCCAAATATTGCCTGCT                         |                  |                                                                                                                      |
| <i>thnM1-F</i>   | CGATGCTGGTGTGACTGAG                          |                  | For qRT-PCR of <i>thnM1</i>                                                                                          |
| <i>thnM1-R</i>   | CGAATGGCCCAAATCGAACT                         |                  |                                                                                                                      |
| <i>thnT1-F</i>   | GCTCCTCGAAATGGACGATG                         |                  | For qRT-PCR of <i>thnT1</i>                                                                                          |
| <i>thnT1-R</i>   | CGCGTACAGCAGAATCTTGT                         |                  |                                                                                                                      |
| <i>thnG-F</i>    | CGGCTGGCCATGAGATATTG                         |                  | For qRT-PCR of <i>thnG</i>                                                                                           |
| <i>thnG-R</i>    | GACGATGCGAAAGCTAGTCC                         |                  |                                                                                                                      |
| <i>thnA-F</i>    | GAGTCAGGCTGGAACGAAA                          |                  | For qRT-PCR of <i>thnA</i>                                                                                           |
| <i>thnA-R</i>    | ATCGTATGTGGGACTCGCTT                         |                  |                                                                                                                      |
| <i>thnM2-F</i>   | GTCAACACTGGTCTGACTGC                         |                  | For qRT-PCR of <i>thnM2</i>                                                                                          |
| <i>thnM2-R</i>   | TCGTGTCGATATCACCGGAT                         |                  |                                                                                                                      |
| <i>thnM3-F</i>   | CCAAATCGACACCGTAGCAG                         |                  | For qRT-PCR of <i>thnM3</i>                                                                                          |
| <i>thnM3-R</i>   | CTGGATCCCAGTTGTGGAGT                         |                  |                                                                                                                      |
| <i>thnT2-F</i>   | GTTTGTGCTGACCGACCAT                          |                  | For qRT-PCR of <i>thnT2</i>                                                                                          |
| <i>thnT2-R</i>   | GGTGTTCGATTTGGGTCTGC                         |                  |                                                                                                                      |
| <i>orf3-F</i>    | TGATCGACAGACATTGGGT                          |                  | For qRT-PCR of <i>orf3</i>                                                                                           |
| <i>orf3-R</i>    | TGACCTCCGACGAAGTACAG                         |                  |                                                                                                                      |
| <i>16S-RT-F</i>  | AAAGAGCTTGTAGGCGGTCT                         |                  | For qRT-PCR of <i>16S</i> RNA                                                                                        |
| <i>16S-RT-R</i>  | TTCACCGCTACACCAGGAAT                         | -                |                                                                                                                      |
